# Supplementary material
Source: PubMed Central journal article supplement (PMC3793852)
Supplement: NIHMS516430-supplement-1_si_001.pdf [file NIHMS516430-supplement-1_si_001.pdf]

## Supporting Information

### A Fundamental Relationship between Hydrophobic Properties and Biological Activity for the Duocarmycin SA Class of DNA Alkylating Antitumor Drugs: Hydrophobic Binding-Driven-Bonding

Amanda L. Wolfe, Katharine K. Duncan, James P. Lajiness, Kaicheng Zhu, Adam S. Duerfeldt,  
and Dale L. Boger\*

*Contribution from the Department of Chemistry and The Skaggs Institute for Chemical Biology,  
The Scripps Research Institute, 10550 North Torrey Pines Road, La Jolla, California 92037*

|                                                                                                           |   |
|-----------------------------------------------------------------------------------------------------------|---|
| Table of Contents.....                                                                                    | 1 |
| Figure S1. DNA alkylation gel of <b>10a–10e</b> (time dependence).....                                    | 2 |
| Figure S2. DNA alkylation gel of <b>10a–10e</b> (concentration dependence).....                           | 3 |
| Table S1. Cell growth inhibition (HCT116) and cLogP for <i>seco</i> -duocarmycin SA and <b>15a–e</b> .... | 4 |
| Figure S3. Plot of $-\log IC_{50}$ of <b>15a-15e</b> (HCT116) versus cLogP.....                           | 4 |
| Figure S4. Plot of log AE versus cLogP for <b>10a-10e</b> using cleavage band.....                        | 5 |
| Figure S5. Plot of $-\log IC_{50}$ versus log AE for <b>10a-10e</b> .....                                 | 5 |

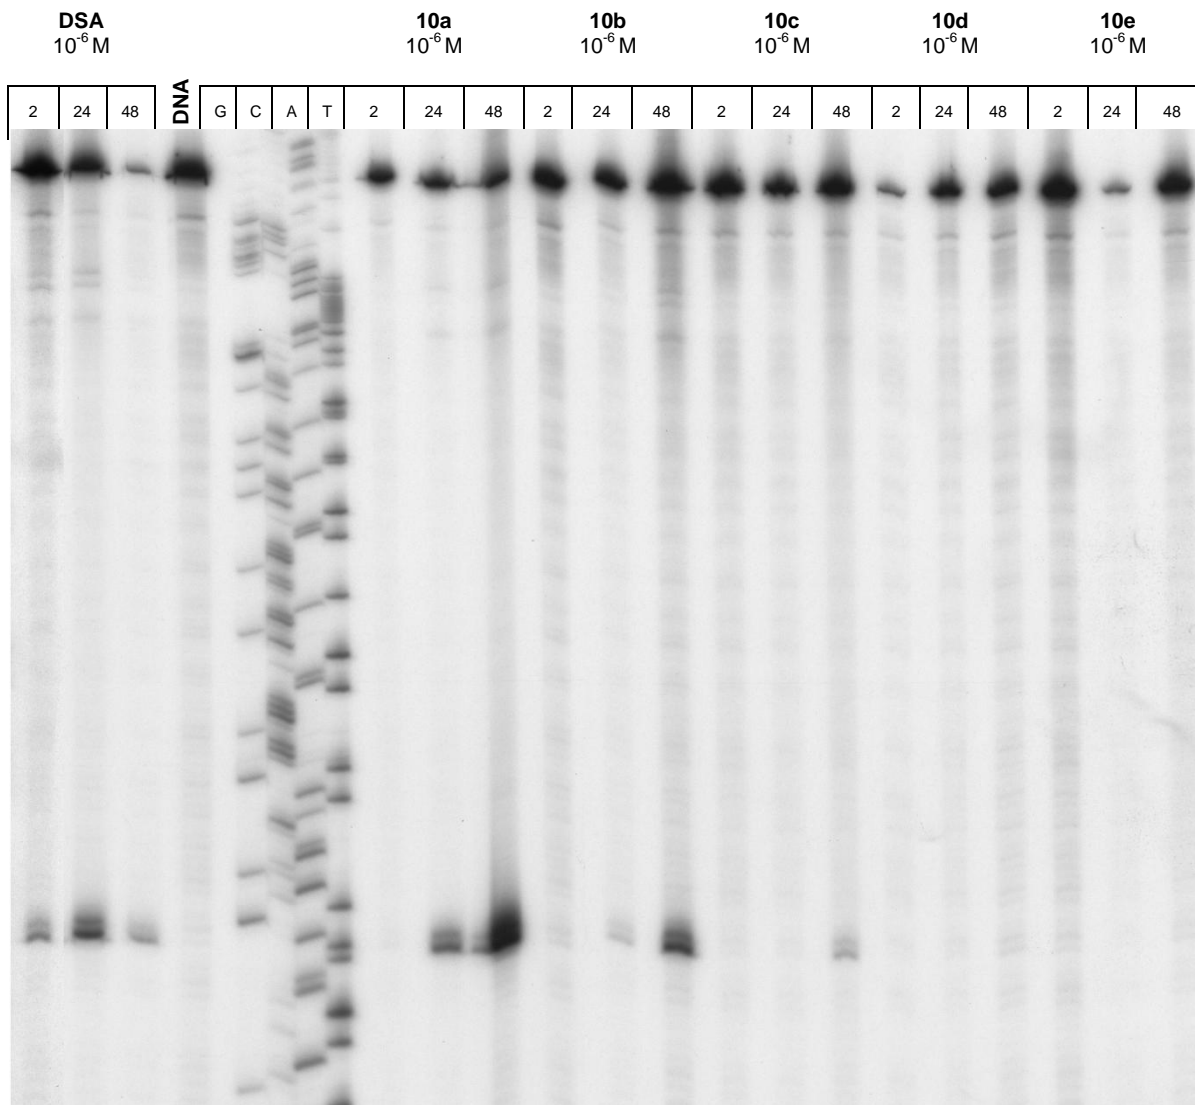

**Figure S1.** Thermally induced strand cleavage of w794 DNA following DNA alkylation; DNA-agent incubation at 23 °C for 2, 24, and 48 h, removal of unbound agent by EtOH precipitation, and 30 min of thermolysis (100 °C) followed by 8% denaturing PAGE and autoradiography. Lanes 1–3 duocarmycin SA ( $1 \times 10^{-6}$ ); lane 4, control DNA; lanes 5–8, Sanger G, C, A, and T sequencing reactions; lanes 9–11, **10a** ( $1 \times 10^{-6}$ ); lanes 12–14, **10b** ( $1 \times 10^{-6}$ ); lanes 15–17, **10c** ( $1 \times 10^{-6}$ ); lanes 18–20, **10d** ( $1 \times 10^{-6}$ ); lanes 21–23, **10e** ( $1 \times 10^{-6}$ ).

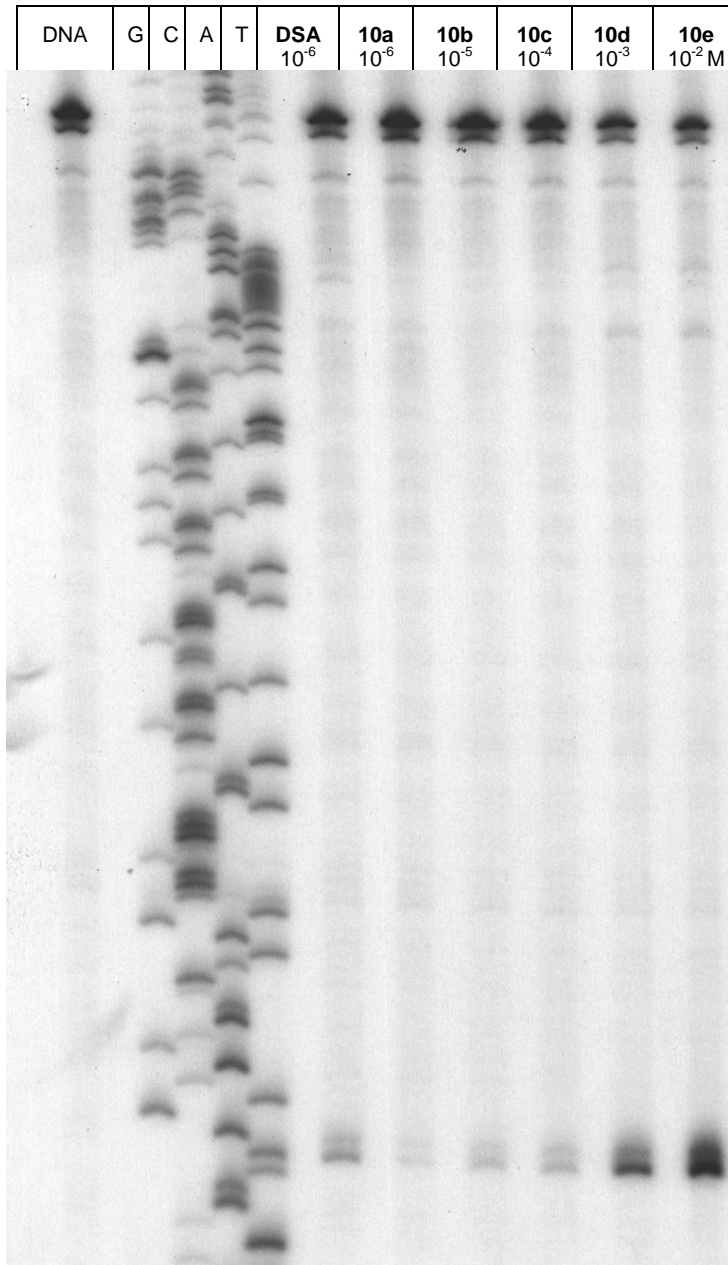

**Figure S2.** Thermally induced strand cleavage of w794 DNA; DNA-agent incubation at 23 °C for 2 h, removal of unbound agent by EtOH precipitation, and 30 min of thermolysis (100 °C) followed by 8% denaturing PAGE and autoradiography. Lane 1 control DNA; lanes 2–5, Sanger G, C, A, and T sequencing reactions; lane 6, duocarmycin SA ( $1 \times 10^{-6}$ ); lane 7, **10a** ( $1 \times 10^{-6}$ ); lane 8, **10b** ( $1 \times 10^{-5}$ ); lane 9, **10c** ( $1 \times 10^{-4}$ ); lane 10, **10d** ( $1 \times 10^{-3}$ ); lane 11, **10e** ( $1 \times 10^{-2}$ ).

| compound              | IC <sub>50</sub><br>(pM, HCT116) | cLogP |
|-----------------------|----------------------------------|-------|
| (+)- <i>seco</i> -DSA | 50                               | 2.44  |
| <b>15a</b>            | 75                               | 2.33  |
| <b>15b</b>            | 87                               | 2.20  |
| <b>15c</b>            | 195                              | 2.06  |
| <b>15d</b>            | 310                              | 1.93  |
| <b>15e</b>            | 466                              | 1.79  |

**Table S1.** Cell growth inhibition (HCT116) and cLogP for *seco*-duocarmycin SA and **15a–e**.

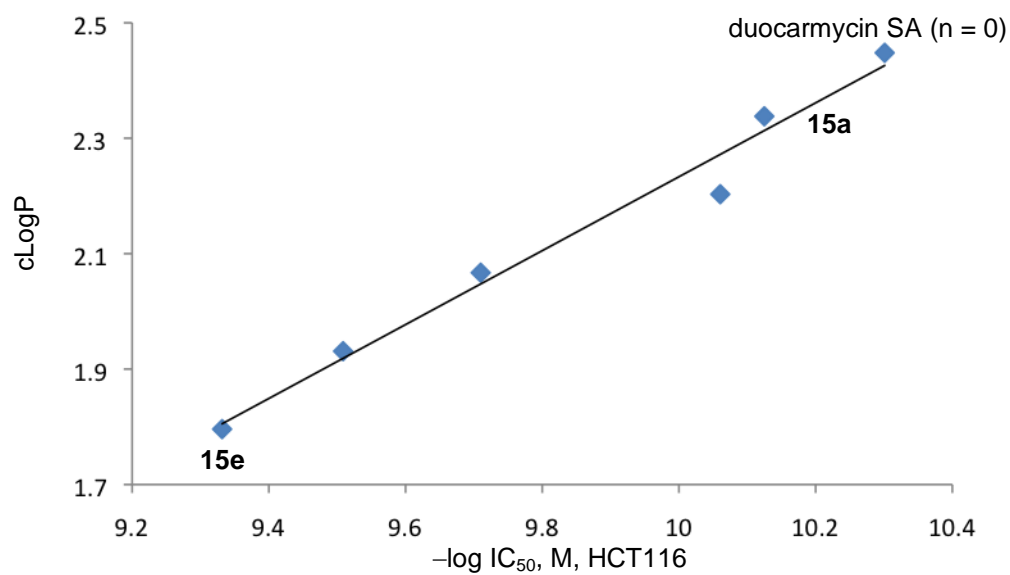

**Figure S3.** Plot of  $-\log IC_{50}$  of **2** and **15a-15e** (HCT116) versus cLogP,  $r^2 = 0.98$ .

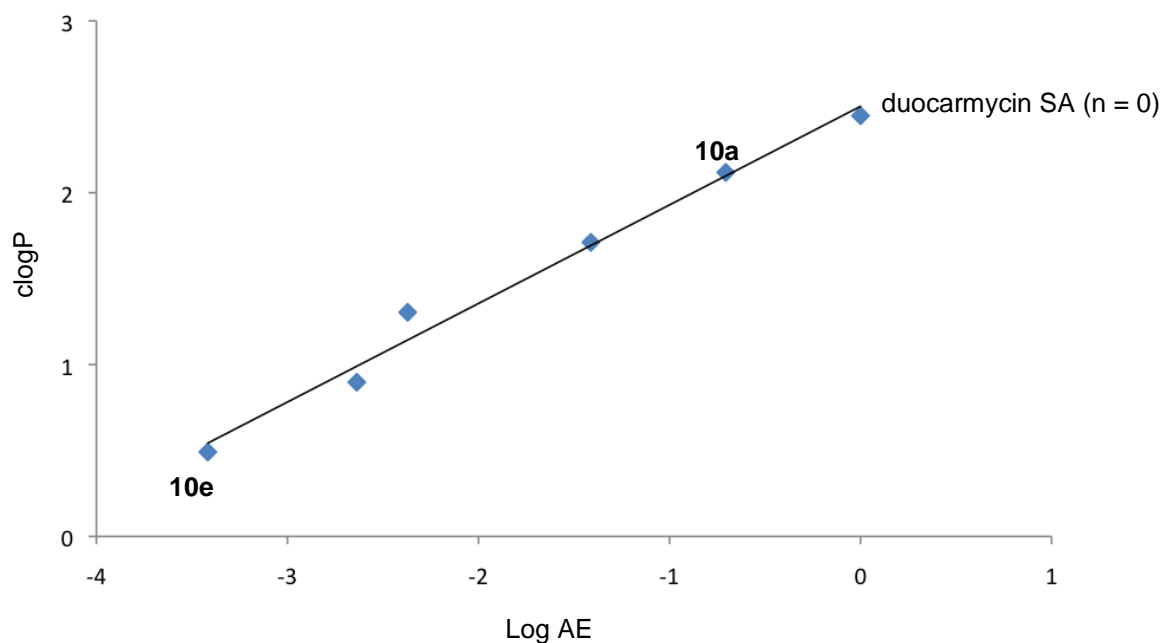

**Figure S4.** Plot of log AE vs cLogP for **2** and **10a-e** using densitometry values from alkylation cleavage band,  $r^2 = 0.98$ . Compare to Fig. 8 with values taken from unreacted full length DNA.

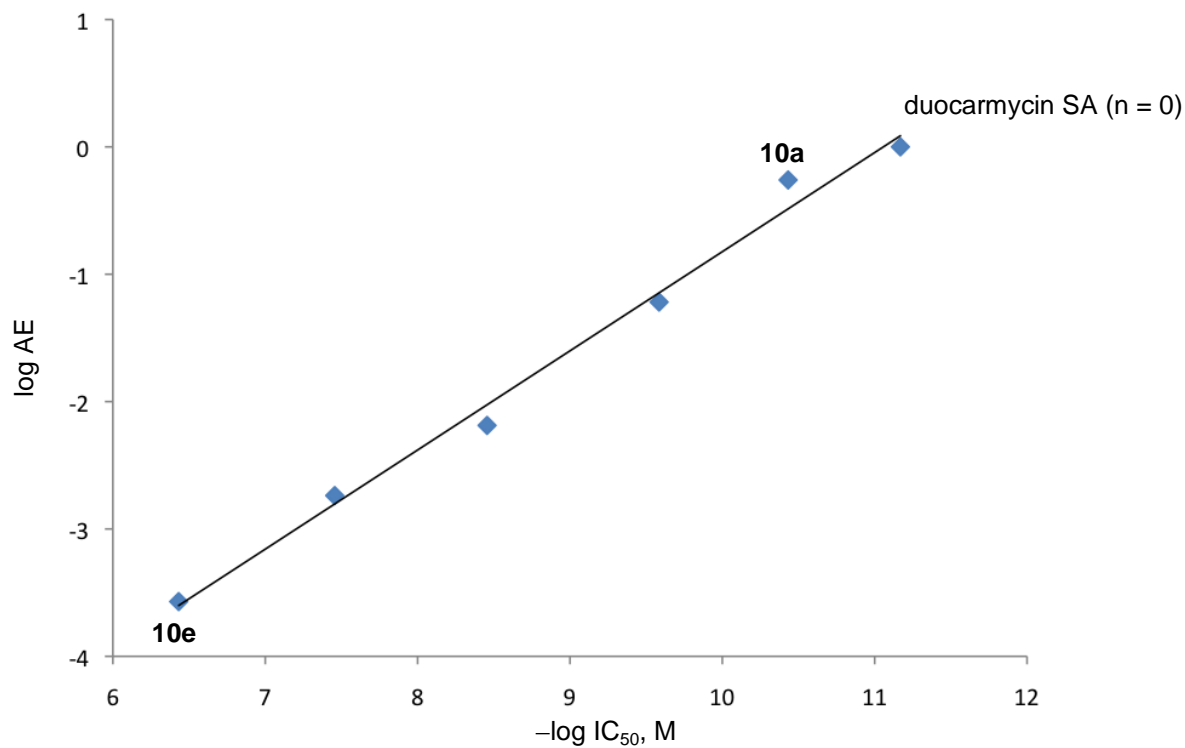

**Figure S5.** Plot of  $-\log IC_{50}$  versus log AE (averaged) for **2** and **10a-e**, slope = 0.85,  $r^2 = 0.99$ .
